# Supplementary material
Source: Springer Nature journal article supplement (https://www.springermedizin.de/resource/supplementary/12916_2012_765_MOESM10_ESM.pdf/9598702)

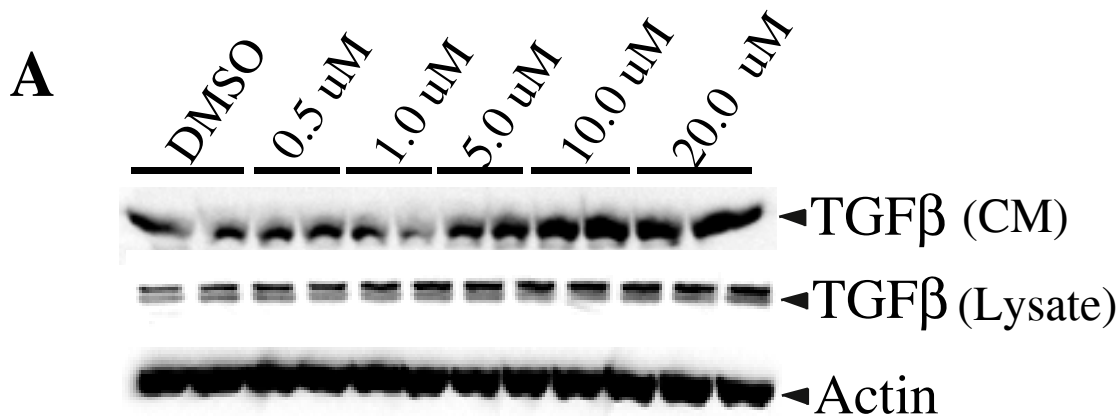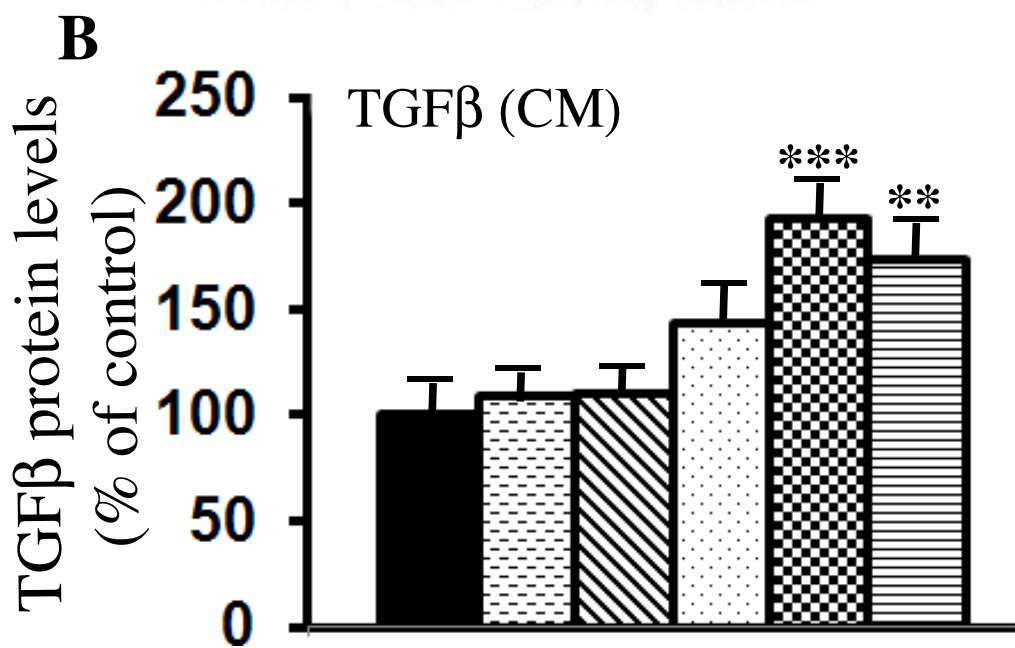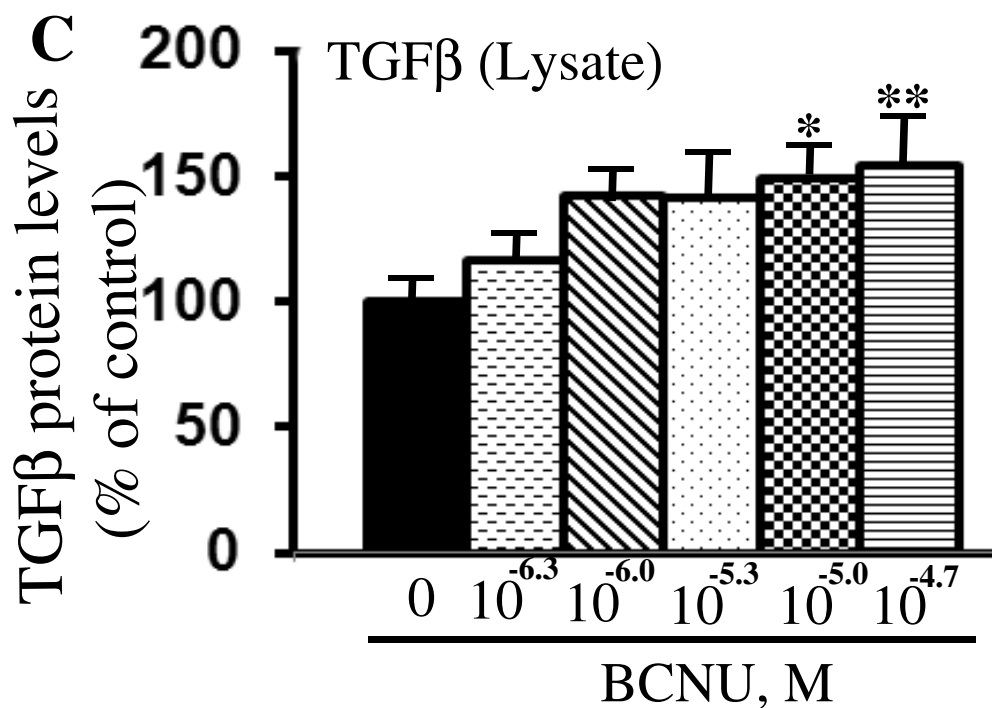

Supplement: MOESM10 [file 9598702]
